# Supplementary material for: Design and mechanistic insight into ultrafast calcium indicators for monitoring intracellular calcium dynamics
Source: PubMed Central journal article supplement (PMC5138832; doi:10.1038/srep38276), 2016-12-06
Supplement: srep38276-s1.pdf [file srep38276-s1.pdf]

# **Design and mechanistic insight into ultrafast calcium indicators for monitoring intracellular calcium dynamics**

Nordine Helassa<sup>a</sup>, Borbala Podor<sup>b</sup>, Alan Fine<sup>b</sup> and Katalin Török<sup>a\*</sup>

<sup>a</sup>Molecular and Clinical Sciences Research Institute, St George's, University of London, Cranmer Terrace, London SW17 0RE, UK; <sup>b</sup>Department of Physiology and Biophysics, Dalhousie University, Halifax, Nova Scotia, Canada

\*Corresponding author: K. Török, Molecular and Clinical Sciences Research Institute, St George's, University of London, Cranmer Terrace, London SW17 0RE, UK  
Phone: +44 2087255832; Fax: +44 2087253581; [k.torok@sgul.ac.uk](mailto:k.torok@sgul.ac.uk)

## **Supplementary Materials**

## Supplementary Figure S1

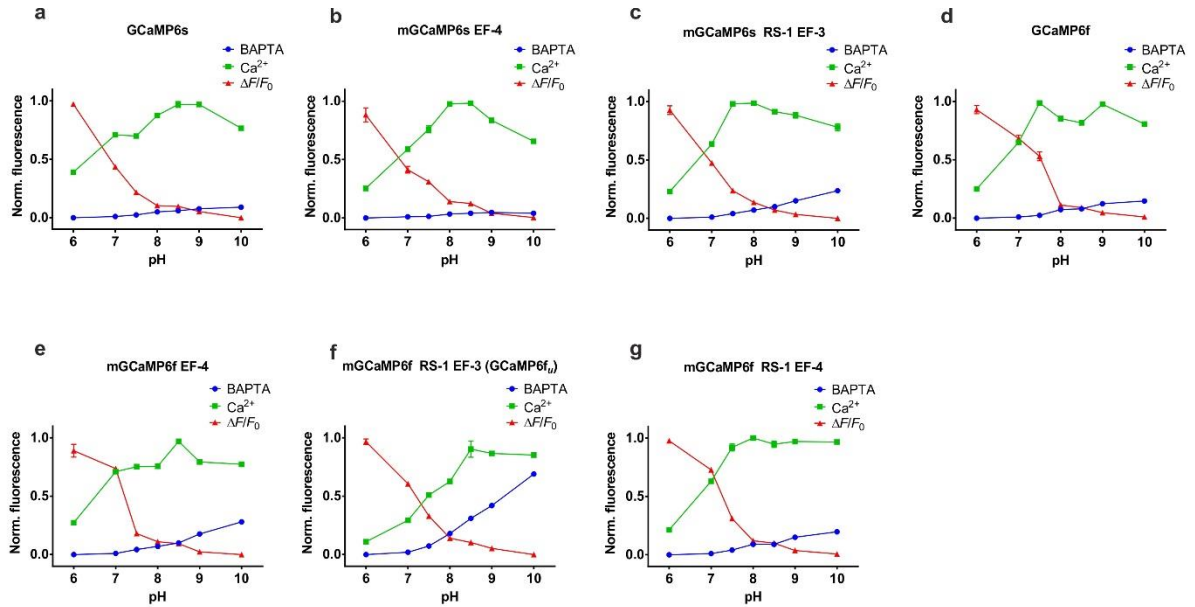

**Supplementary Figure S1.** pH sensitivity and pK<sub>a</sub> determination of (a) GCaMP6s; (b) mGCaMP6s EF-4; (c) mGCaMP6s RS1 EF-3; (d) GCaMP6f; (e) mGCaMP6f EF-4; (f) mGCaMP6f RS1 EF-3 (GCaMP6f<sub>tr</sub>); (g) mGCaMP6f RS1 EF-4. Normalised fluorescence in presence of 1 mM Ca<sup>2+</sup> (■) or 2 mM BAPTA (●); ΔF/F<sub>0</sub> (▲).

Supplementary Figure S2

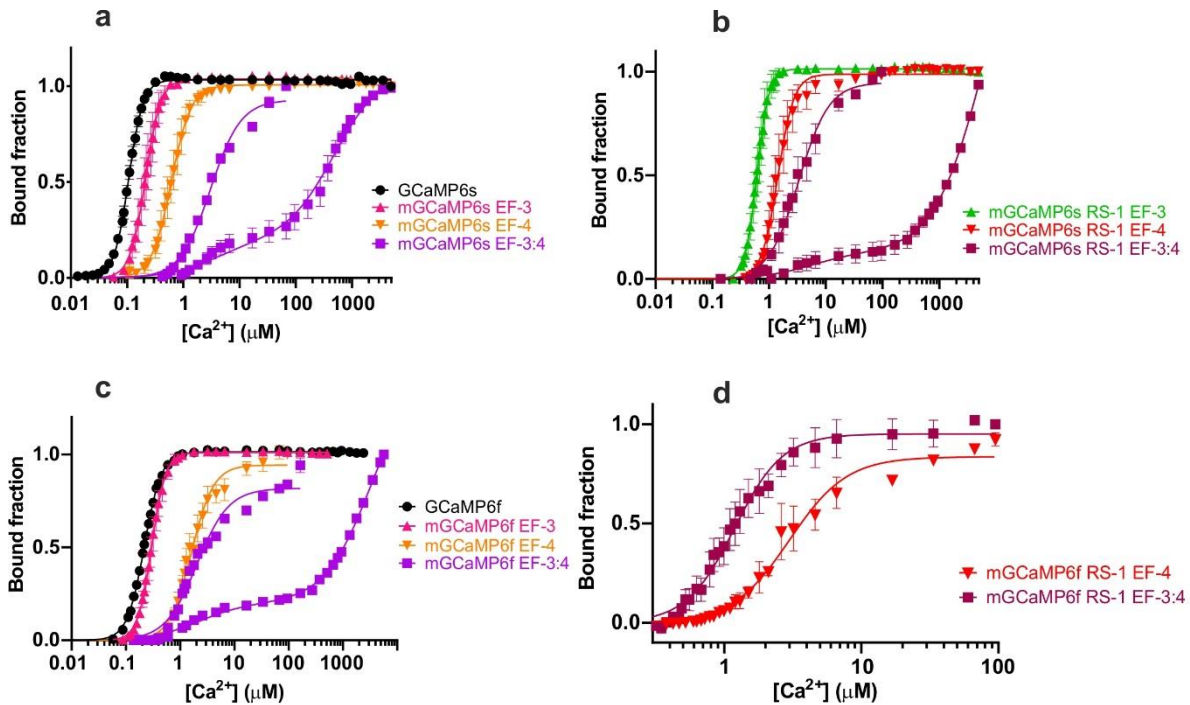

**Supplementary Figure S2.** Comparison of equilibrium  $\text{Ca}^{2+}$  binding of EF-hand and peptide mutant mGCaMP6s and mGCaMP6f to GCaMP6s and GCaMP6f (20 °C). Equilibrium  $\text{Ca}^{2+}$  titrations of (a) GCaMP6s (●), mGCaMP6s EF-3 (▲), mGCaMP6s EF-4 (▼) and mGCaMP6s EF-3:4 (■); (b) mGCaMP6s RS-1 EF-3 (▲), mGCaMP6s RS-1 EF-4 (▼) and mGCaMP6s RS-1 EF-3:4 (■); (c) GCaMP6f (●), mGCaMP6f EF-3 (▲), mGCaMP6f EF-4 (▼) and mGCaMP6f EF-3:4 (■); (d) mGCaMP6f RS-1 EF-4 (▼) and mGCaMP6f RS-1 EF-3:4 (■). Fluorescence changes are normalised to  $F_0$  of 0 and  $F_{\text{max}}$  of 1 and fitted to the Hill equation. Fitted curves are represented by solid lines overlaying the data.

Supplementary Figure S3

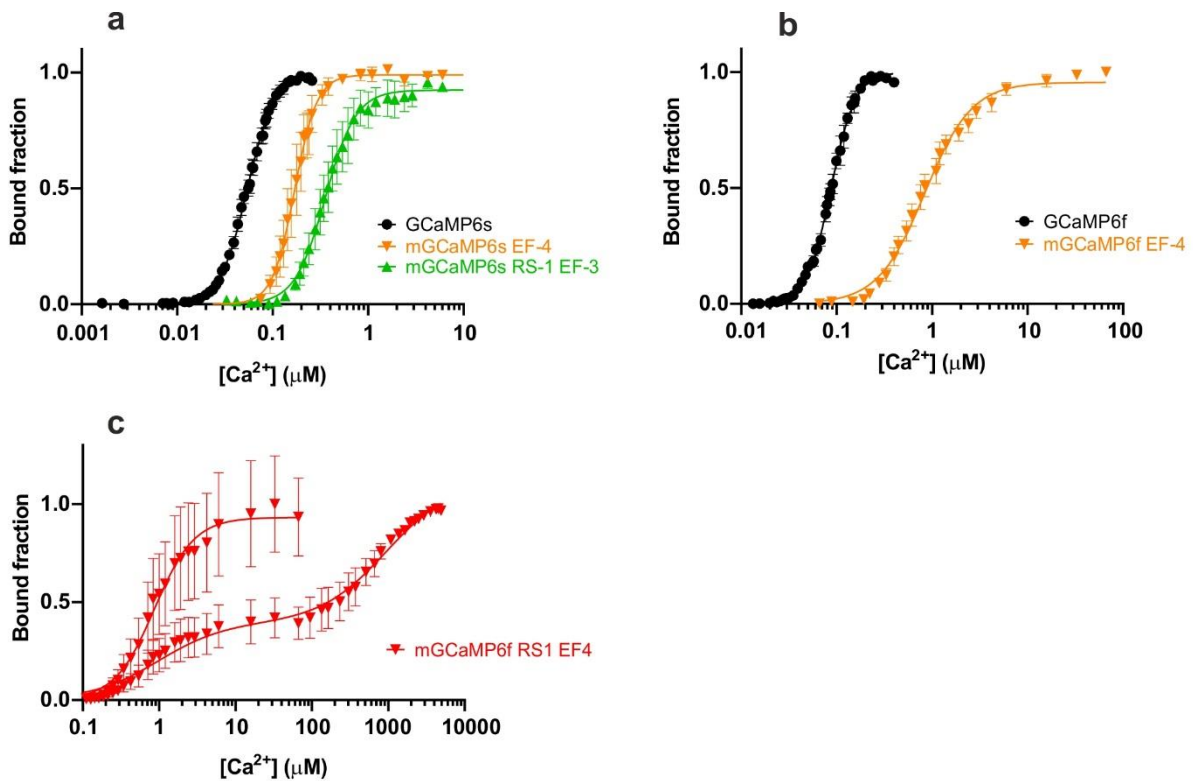

**Supplementary Figure S3.** Comparison of equilibrium  $\text{Ca}^{2+}$  binding of EF-hand and peptide mutant mGCaMP6s and mGCaMP6f to GCaMP6s and GCaMP6f (37 °C). Equilibrium  $\text{Ca}^{2+}$  titrations for (a) GCaMP6s (●), mGCaMP6s EF-4 (▼) and mGCaMP6s RS-1 EF-3 (▲); (b) GCaMP6f (●) and mGCaMP6f EF-4 (▼); (c) mGCaMP6f RS-1 EF-4 (▼). Fluorescence changes are normalized to  $F_0$  of 0 and  $F_{\text{max}}$  of 1 and fitted to the Hill equation ((a) and (b)) and to a two-site binding model (c). Fitted curves are represented by solid lines overlaying the data points.

Supplementary Figure S4

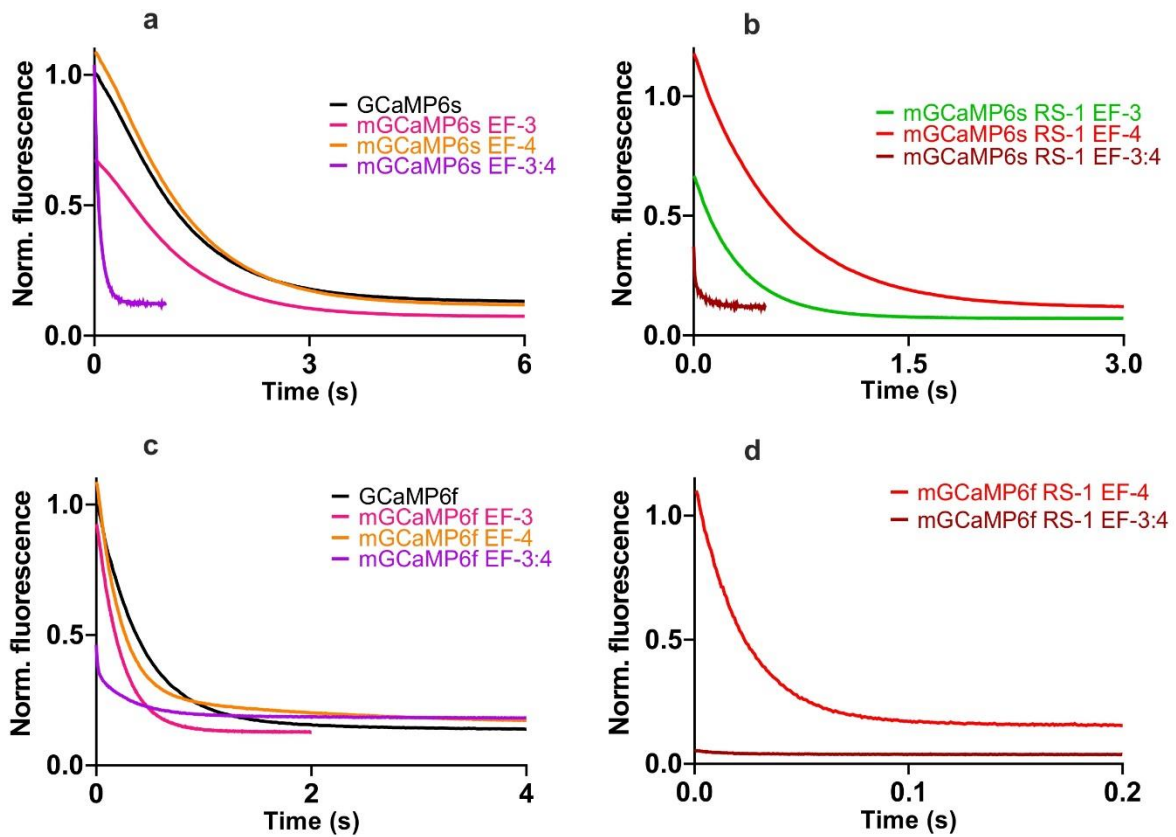

**Supplementary Figure S4.**  $\text{Ca}^{2+}$  dissociation kinetics of EF-hand and peptide mutant mGCaMP6s and mGCaMP6f compared with GCaMP6s and GCaMP6f (20 °C).  $\text{Ca}^{2+}$  dissociation time courses of (a) GCaMP6s (—), mGCaMP6s EF-3 (—), mGCaMP6s EF-4 (—) and mGCaMP6s EF-3:4 (—); (b) mGCaMP6s RS-1 EF-3 (—), mGCaMP6s RS-1 EF-4 (—) and mGCaMP6s RS-1 EF-3:4 (—); (c) GCaMP6f (—), mGCaMP6f EF-3 (—), mGCaMP6f EF-4 (—) and mGCaMP6f EF-3:4 (—); (d) mGCaMP6f RS-1 EF-4 (—) and mGCaMP6f RS-1 EF-3:4 (—). Fluorescence intensities are relative to  $\text{Ca}^{2+}$ -bound GCaMP6s (panels a and b) and to  $\text{Ca}^{2+}$ -bound GCaMP6f (panels c and d).

Supplementary Figure S5

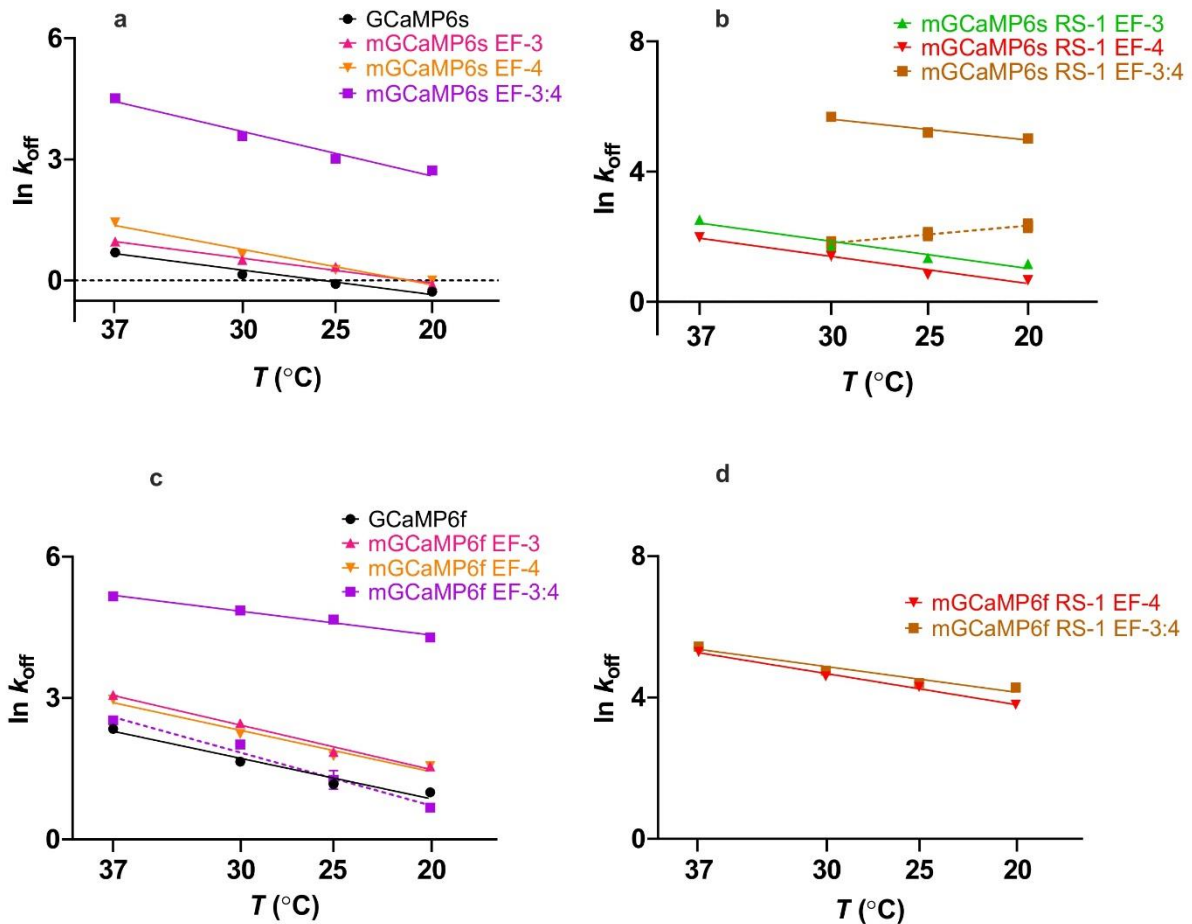

**Supplementary Figure S5.** Arrhenius plots of the observed rates for  $\text{Ca}^{2+}$  dissociation of EF-hand and peptide mutant mGCaMP6s and mGCaMP6f compared with GCaMP6s and GCaMP6f. (a) GCaMP6s (—), mGCaMP6s EF-3 (—), mGCaMP6s EF-4 (—) and mGCaMP6s EF-3:4 (—); (b) mGCaMP6s RS-1 EF-3 (—), mGCaMP6s RS-1 EF-4 (—) and mGCaMP6s RS-1 EF-3:4 (—); (c) GCaMP6f (—), mGCaMP6f EF-3 (—), mGCaMP6f EF-4 (—) and mGCaMP6f EF-3:4 (—); (d) mGCaMP6f RS-1 EF-4 (—) and mGCaMP6f RS-1 EF-3:4 (—). For mGCaMP6 with biphasic kinetics, the slower rate is shown in dotted line and the faster rate is in solid line.

Supplementary Figure S6

|                                  | GCaMP6f              | GCaMP6f RS-1 EF-3    |
|----------------------------------|----------------------|----------------------|
| Best-fit values                  |                      |                      |
| Slope                            | -7322 ± 282.0        | -5624 ± 202.9        |
| Y-intercept when X=0.0           | 25.85 ± 0.9346       | 23.64 ± 0.6734       |
| X-intercept when Y=0.0           | 0.003531             | 0.004204             |
| 1/slope                          | -0.0001366           | -0.0001778           |
| 95% Confidence Intervals         |                      |                      |
| Slope                            | -7910 to -6734       | -6045 to -5204       |
| Y-intercept when X=0.0           | 23.90 to 27.80       | 22.25 to 25.04       |
| X-intercept when Y=0.0           | 0.003514 to 0.003550 | 0.004142 to 0.004276 |
| Goodness of Fit                  |                      |                      |
| R square                         | 0.9712               | 0.9722               |
| Sy.x                             | 0.0867               | 0.06573              |
| Is slope significantly non-zero? |                      |                      |
| F                                | 674                  | 768.7                |
| DFn, DFd                         | 1.000, 20.00         | 1.000, 22.00         |
| P value                          | < 0.0001             | < 0.0001             |
| Deviation from zero?             | Significant          | Significant          |
| Data                             |                      |                      |
| Number of X values               | 7                    | 7                    |
| Maximum number of Y replicates   | 4                    | 4                    |
| Total number of values           | 22                   | 24                   |
| Number of missing values         | 27                   | 25                   |
|                                  |                      |                      |
| Equation                         | Y = -7322*X + 25.85  | Y = -5624*X + 23.64  |

**Supplementary Figure S6.** Regression statistics for data in Fig. 1f.

## Supplementary Figure S7

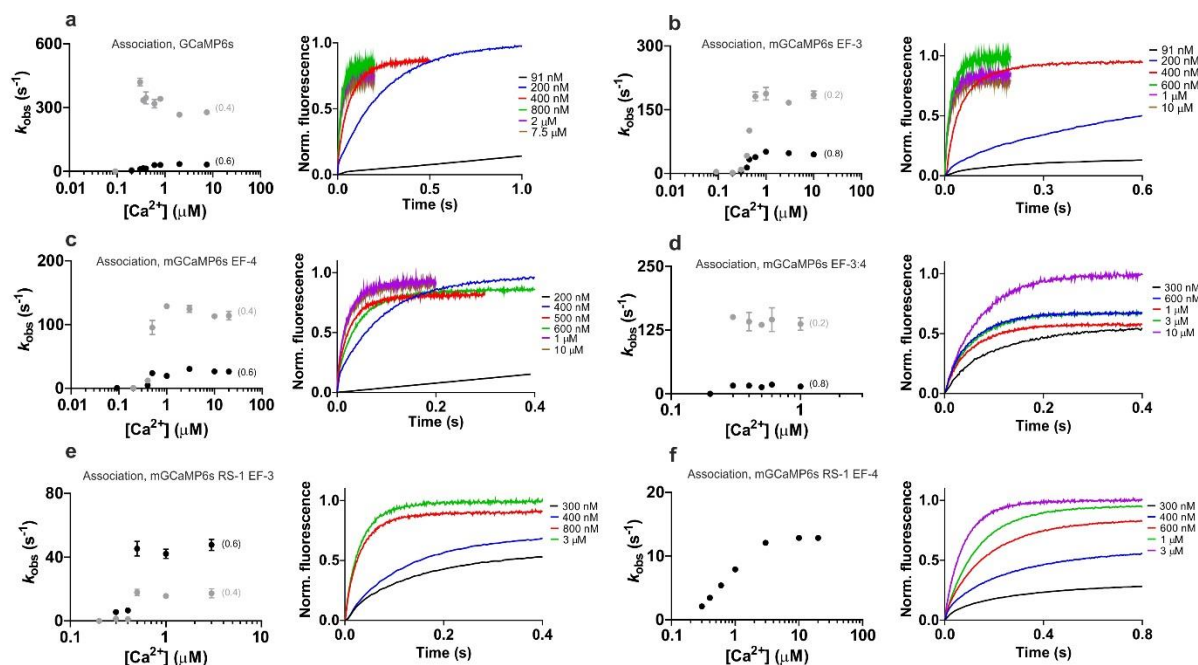

**Supplementary Figure S7.**  $\text{Ca}^{2+}$  association kinetics of GCaMP6s and its EF-hand and peptide mutants at 20 °C (a) GCaMP6s; (b) mGCaMP6s EF-3; (c) mGCaMP6s EF-4; (d) mGCaMP6s EF-3:4; (e) mGCaMP6s RS-1 EF-3; (f) mGCaMP6s RS-1 EF-4. In each panel, the left hand side plot shows the  $[\text{Ca}^{2+}]$  dependence of the observed rate(s) ( $k_{\text{obs}}$ ) and on the right hand side stopped-flow records obtained at the specified final  $[\text{Ca}^{2+}]$  values are displayed. For mGCaMP6 with biphasic association kinetics (panels a-e), the dominant component (larger fluorescence amplitude) is shown in black. The relative amplitudes of the fast and slow phases are given in parentheses. Fluorescence changes are normalised to  $F_0$  of 0 and maximum of 1.



Supplementary Figure S8

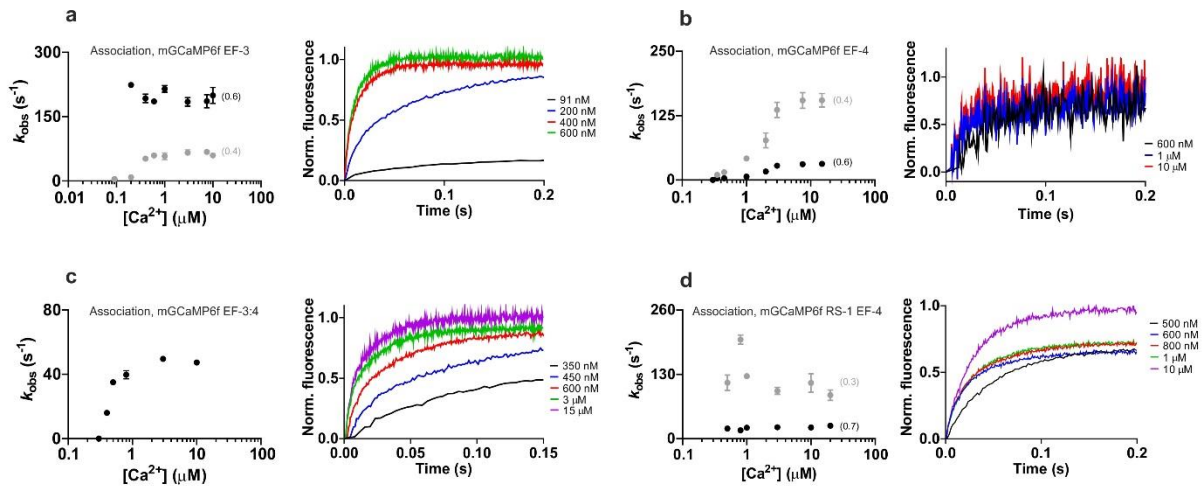

**Supplementary Figure S8.**  $\text{Ca}^{2+}$  association kinetics of the EF-hand and peptide mutants of GCaMP6f (20 °C). (a) mGCaMP6f EF-3; (b) mGCaMP6f EF-4; (c) mGCaMP6f EF-3:4; (d) mGCaMP6f RS-1 EF-4. In each panel, the left hand side plot shows the  $[\text{Ca}^{2+}]$  dependence of the observed rate(s) ( $k_{\text{obs}}$ ) and on the right hand side stopped-flow records obtained at the specified final  $[\text{Ca}^{2+}]$  values are displayed. For mGCaMP6 with biphasic association kinetics (panels a, b and d), the dominant component (larger relative fluorescence amplitude) is shown in black. The relative amplitudes of the fast and slow phases are given in parentheses. Fluorescence changes are normalised to  $F_0$  of 0 and maximum of 1.

Supplementary Figure S9

|                                  | GCaMP6f slow         | GCaMP6f fast        | GCaMP6f RS-1 EF-3    |
|----------------------------------|----------------------|---------------------|----------------------|
| Best-fit values                  |                      |                     |                      |
| Slope                            | -2971 ± 300.0        | -1602 ± 602.0       | -7735 ± 1006         |
| Y-intercept when X=0.0           | 13.72 ± 1.003        | 11.29 ± 2.046       | 31.33 ± 3.376        |
| X-intercept when Y=0.0           | 0.004619             | 0.007049            | 0.00405              |
| 1/slope                          | -0.0003366           | -0.0006243          | -0.0001293           |
| 95% Confidence Intervals         |                      |                     |                      |
| Slope                            | -3589 to -2353       | -2914 to -290.2     | -9879 to -5592       |
| Y-intercept when X=0.0           | 11.66 to 15.79       | 6.833 to 15.75      | 24.14 to 38.52       |
| X-intercept when Y=0.0           | 0.004399 to 0.004955 | 0.005405 to 0.02354 | 0.003899 to 0.004317 |
| Goodness of Fit                  |                      |                     |                      |
| R square                         | 0.7969               | 0.3711              | 0.7977               |
| Sy.x                             | 0.1221               | 0.1277              | 0.1737               |
| Is slope significantly non-zero? |                      |                     |                      |
| F                                | 98.09                | 7.082               | 59.14                |
| DFn, DFd                         | 1.000, 25.00         | 1.000, 12.00        | 1.000, 15.00         |
| P value                          | < 0.0001             | 0.0207              | < 0.0001             |
| Deviation from zero?             | Significant          | Significant         | Significant          |
| Data                             |                      |                     |                      |
| Number of X values               | 8                    | 5                   | 5                    |
| Maximum number of Y replicates   | 5                    | 4                   | 4                    |
| Total number of values           | 27                   | 14                  | 17                   |
| Number of missing values         | 29                   | 42                  | 39                   |
| Equation                         | Y = -2971*X + 13.72  | Y = -1602*X + 11.29 | Y = -7735*X + 31.33  |

**Supplementary Figure S9.** Regression statistics for data in Fig. 2e.

Supplementary Figure S10

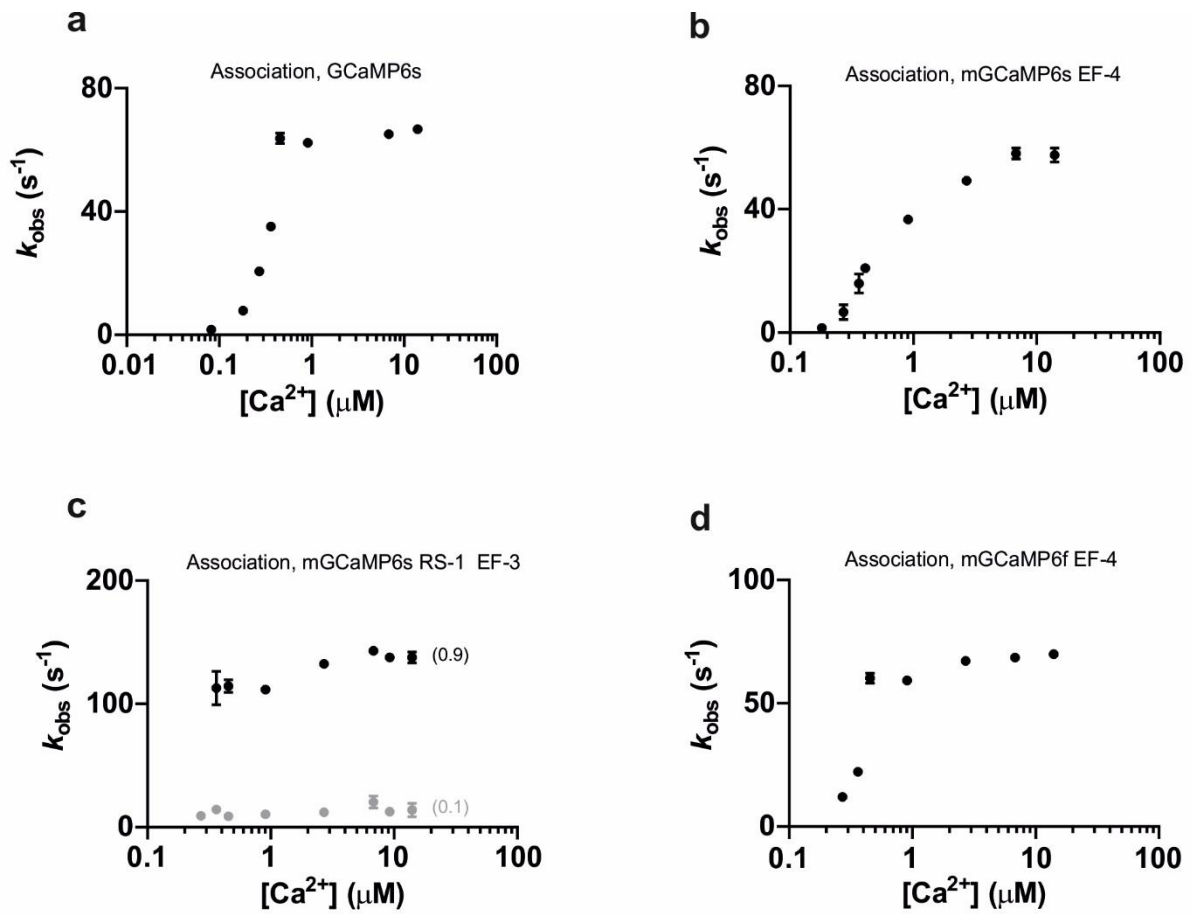

**Supplementary Figure S10.** Ca<sup>2+</sup> dependence of association kinetics of selected probes at 37 °C. [Ca<sup>2+</sup>] dependence of the observed rate(s) ( $k_{\text{obs}}$ ) of (a) GCaMP6s; (b) mGCaMP6s EF-4; (c) mGCaMP6s RS-1 EF-3 and (d) mGCaMP6f EF-4. For mGCaMP6s RS-1 EF-3 biphasic association kinetics, the dominant component (larger relative fluorescence amplitude) is shown in black. The relative amplitudes of the fast and slow phases are given in parentheses.

Supplementary Figure S11

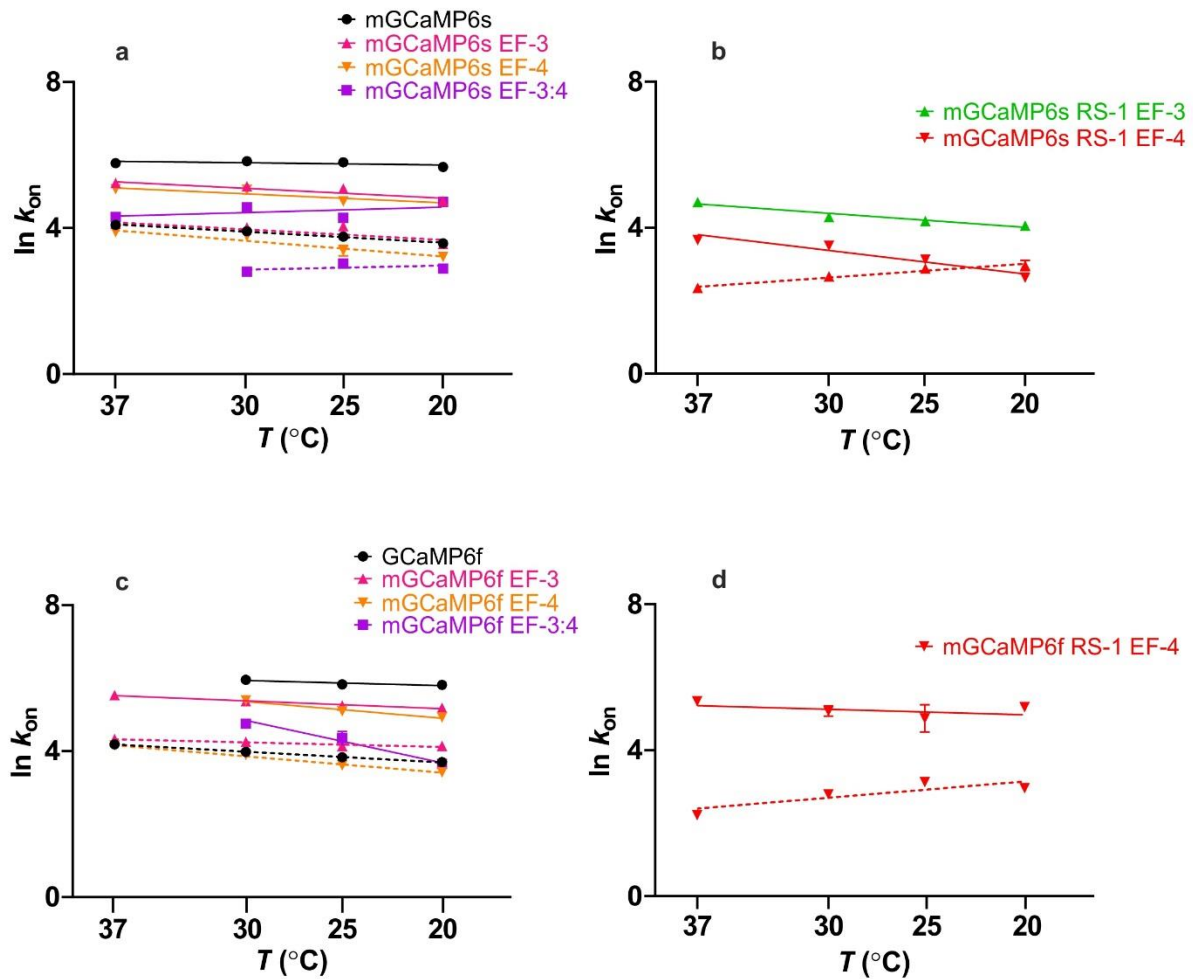

**Supplementary Figure S11.** Arrhenius plots of the observed rates for  $\text{Ca}^{2+}$  association of EF-hand and peptide mutant mGCaMP6s and mGCaMP6f compared with GCaMP6s and GCaMP6f. (a) GCaMP6s (—), mGCaMP6s EF-3 (—), mGCaMP6s EF-4 (—) and mGCaMP6s EF-3:4 (—); (b) mGCaMP6s RS-1 EF-3 (—) and mGCaMP6s RS-1 EF-4 (—); (c) GCaMP6f (—), mGCaMP6f EF-3 (—), mGCaMP6f EF-4 (—) and mGCaMP6f EF-3:4 (—); (d) mGCaMP6f RS-1 EF-4 (—). For mGCaMP6 with biphasic kinetics, the slower rate is shown in dotted line and the faster rate is in solid line.

Supplementary Figure S12

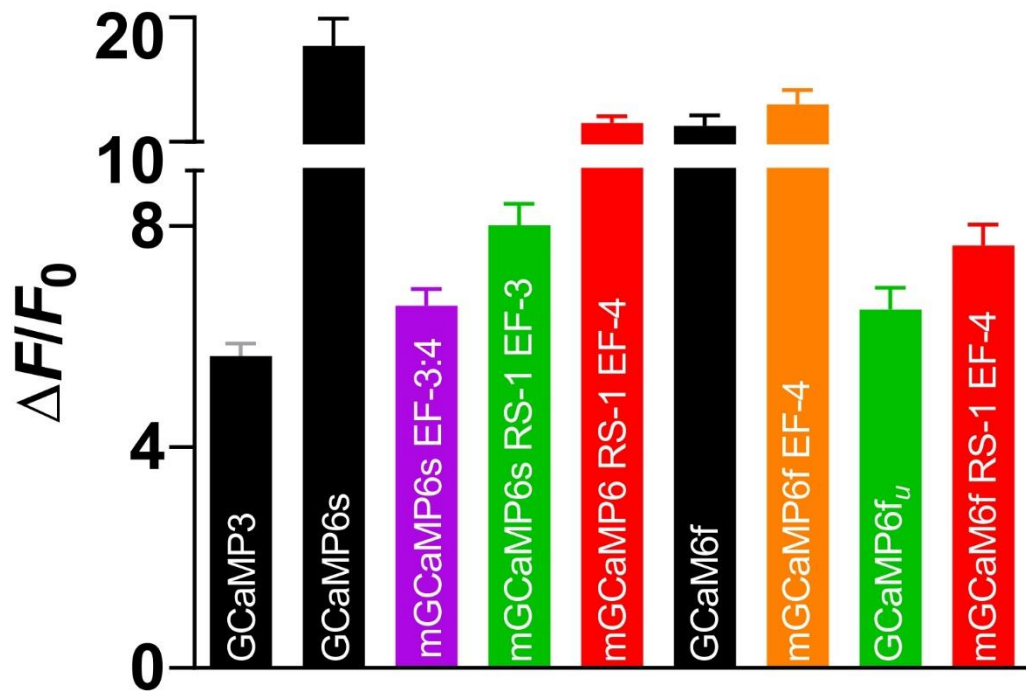

**Supplementary Figure S12.** Imaging of GCaMP6-derived probes in HEK293T cells. Fluorescence dynamic ranges of selected probes obtained following ionomycin stimulation.

Supplementary Figure S13

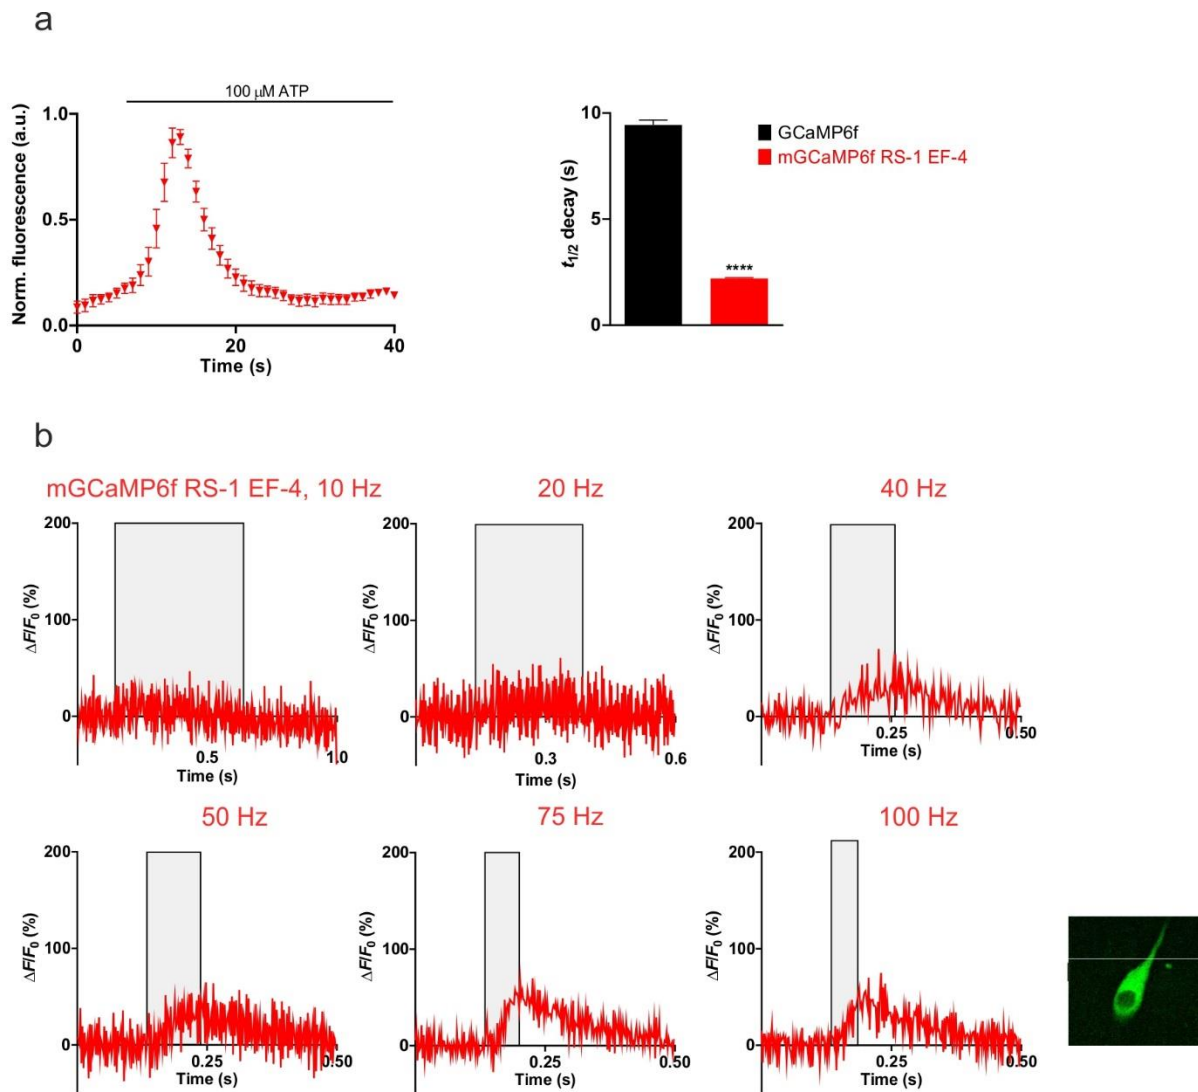

**Supplementary Figure S13.**  $\text{Ca}^{2+}$  response of mGCaMP6f RS-1 EF-4 in stimulated HEK293T cells and post-synaptic CA1 neurons. **(a)**  $\text{Ca}^{2+}$  transients were triggered by exposure of HEK293T cells to 100  $\mu\text{M}$  ATP. Time course of response of mGCaMP6f RS-1 EF-4 was recorded with 1 s intervals.  $t_{1/2}$  for mGCaMP6f RS-1 EF-4 of  $2.2 \pm 0.04$  s was significantly different from that for GCaMP6f ( $9.4 \pm 0.2$  s). **(b)**  $\text{Ca}^{2+}$  response of mGCaMP6f RS-1 EF-4 in stimulated post-synaptic CA1 neurons is imaged by two-photon microscopy. GCaMP6f RS-1 EF-4 stimulated (3 cells, n number of recordings in brackets) by 5 AP-s at 10 Hz ( $n = 20$ ), 20 Hz ( $n = 27$ ), 40 Hz ( $n = 30$ ), 50 Hz ( $n = 30$ ), 75 Hz ( $n = 30$ ) and 100 Hz ( $n = 30$ ). Grey shaded areas indicate the duration of stimulation. The achieved maximum  $\Delta F/F_0$  values are plotted against time. Inset image: representative image baseline expression of mGCaMP6f RS-1 EF-4 in CA1 pyramidal neurons with white line in the position of the line scan.

**Supplementary Table S1. Summary of the biophysical characteristics of single EF-hand mutated mGCaMP6s and mGCaMP6f probes.**

|                                                     | $F_{T(-Ca^{2+})}$ | $F_{T(+Ca^{2+})}$ | $\frac{F_{T(+Ca^{2+})}}{F_{T(-Ca^{2+})}}$ | $K_d$<br>( $\mu M$ )                                           | $n$                    | $k_{on(lim)}^a$<br>( $s^{-1}$ ) | $t_{1/2(on)}$<br>(ms) | $k_{off}^a$<br>( $s^{-1}$ ) | $t_{1/2(off)}$<br>(ms) |
|-----------------------------------------------------|-------------------|-------------------|-------------------------------------------|----------------------------------------------------------------|------------------------|---------------------------------|-----------------------|-----------------------------|------------------------|
| GCaMP6s 20 °C                                       | 1.0 ± 0.1         | 27.3 ± 0.5        | 27.3 ± 0.9                                | 0.11 ± 0.01                                                    | 3.4 ± 0.1              | 306 ± 12 (0.4)<br>31 ± 1 (0.6)  | 2<br>22               | 0.9                         | 769                    |
| GCaMP6s 37 °C                                       | 1.0 ± 0.01        | 23.3 ± 0.1        | 23.3 ± 0.3                                | 0.054 ± 0.005                                                  | 3.0 ± 0.1              | 324 ± 23 (0.1)<br>59 ± 3 (0.9)  | 2<br>12               | 2.0 ± 0.1                   | 346                    |
| mGCaMP6s EF-3 20 °C                                 | 1.1 ± 0.2         | 19.4 ± 0.2        | 18.1 ± 2.2                                | 0.21 ± 0.01                                                    | 3.2 ± 0.1              | 180 ± 5 (0.2)<br>46 ± 2 (0.8)   | 4<br>15               | 0.9                         | 769                    |
| mGCaMP6s EF-3 37 °C                                 | n.d.              | n.d.              | n.d.                                      | n.d.                                                           | n.d.                   | 187 ± 6 (0.5)<br>61 ± 3 (0.5)   | 4<br>11               | 2.6 ± 0.1                   | 266                    |
| mGCaMP6s EF-4 20 °C                                 | 0.7 ± 0.1         | 20.0 ± 0.3        | 28.6 ± 1.1                                | 0.61 ± 0.01                                                    | 2.5 ± 0.1              | 120 ± 4 (0.4)<br>27 ± 2 (0.6)   | 6<br>26               | 0.9                         | 769                    |
| mGCaMP6s EF-4 37 °C                                 | 0.9 ± 0.04        | 21.2 ± 1.0        | 23.9 ± 0.3                                | 0.170 ± 0.005                                                  | 3.7 ± 0.4              | 162 ± 22 (0.2)<br>49 ± 4 (0.8)  | 4<br>14               | 4.2 ± 0.2                   | 165                    |
| mGCaMP6s RS-1 EF-3 20 °C                            | 1.2 ± 0.1         | 21.1 ± 0.1        | 18.1 ± 0.7                                | 0.62 ± 0.01                                                    | 4.2 ± 0.1              | 45 ± 2 (0.6)<br>17 ± 1 (0.4)    | 15<br>41              | 3.2 ± 0.1                   | 216                    |
| mGCaMP6s RS-1 EF-3 37 °C                            | 1.0 ± 0.01        | 14.1 ± 0.1        | 14.1 ± 0.2                                | 0.36 ± 0.01                                                    | 2.7 ± 0.2              | 110 ± 1 (0.9)<br>11 ± 1 (0.1)   | 6<br>63               | 13 ± 1                      | 53                     |
| mGCaMP6s RS-1 EF-4 20 °C                            | 0.7 ± 0.1         | 21.8 ± 0.7        | 30.7 ± 1.1                                | 1.4 ± 0.1                                                      | 3.1 ± 0.1              | 13 ± 1                          | 53                    | 1.7                         | 407                    |
| mGCaMP6s RS-1 EF-4 37 °C                            | n.d.              | n.d.              | n.d.                                      | n.d.                                                           | n.d.                   | 39 ± 3                          | 18                    | 39 ± 3                      | 18                     |
| GCaMP6f 20 °C                                       | 0.9 ± 0.1         | 14.4 ± 3.4        | 14.6 ± 2.4                                | 0.22 ± 0.01                                                    | 2.8 ± 0.1              | 315 ± 9 (0.3)<br>38 ± 1 (0.7)   | 2<br>18               | 2.4 ± 0.1                   | 288                    |
| GCaMP6f 37 °C                                       | 1.0 ± 0.1         | 13.8 ± 0.04       | 13.2 ± 0.1                                | 0.088 ± 0.009                                                  | 3.4 ± 0.1              | 66 ± 1                          | 10                    | 11 ± 1                      | 63                     |
| mGCaMP6f EF-3 20 °C                                 | 1.3 ± 0.1         | 15.6 ± 0.3        | 12.4 ± 0.8                                | 0.30 ± 0.03                                                    | 3.4 ± 0.1              | 197 ± 6 (0.6)<br>60 ± 2 (0.4)   | 4<br>12               | 4.5                         | 154                    |
| mGCaMP6f EF-3 37 °C                                 | n.d.              | n.d.              | n.d.                                      | n.d.                                                           | n.d.                   | 255 ± 20 (0.6)<br>76 ± 3 (0.4)  | 3<br>9                | 21 ± 1                      | 33                     |
| mGCaMP6f EF-4 20 °C                                 | 1.1 ± 0.1         | 21.2 ± 0.8        | 20.3 ± 2.0                                | 1.6 ± 0.1                                                      | 2.4 ± 0.1              | 155 ± 10 (0.4)<br>31 ± 2 (0.6)  | 4<br>22               | 4.7                         | 147                    |
| mGCaMP6f EF-4 37 °C                                 | 1.0 ± 0.09        | 16.1 ± 0.3        | 15.8 ± 1                                  | 0.84 ± 0.03                                                    | 1.8 ± 0.1              | 64 ± 1                          | 11                    | 20 ± 1                      | 35                     |
| mGCaMP6f RS-1 EF-3 20 °C<br>(GCaMP6f <sub>i</sub> ) | 1.0 ± 0.1         | 5.1 ± 0.4         | 5.1 ± 0.1                                 | 0.89 ± 0.01                                                    | 3.0 ± 0.1              | 142 ± 4                         | 4.9                   | 89 ± 1                      | 7.8                    |
| mGCaMP6f RS-1 EF-3 37 °C<br>(GCaMP6f <sub>i</sub> ) | 0.9 ± 0.1         | 3.8 ± 0.2         | 4.1 ± 0.2                                 | 0.34 ± 0.01                                                    | 3.0 ± 0.3              | 546 <sup>b</sup>                | 1.3                   | 245 ± 10                    | 2.8                    |
| mGCaMP6f RS-1 EF-4 20 °C                            | 0.9 ± 0.1         | 16.9 ± 0.4        | 19.5 ± 0.4                                | 3.0 ± 0.2 (0.8) <sup>c</sup><br>229 ± 24 (0.2) <sup>c</sup>    | 2.1 ± 0.2<br>1.2 ± 0.1 | 124 ± 9 (0.3)<br>22 ± 1 (0.7)   | 5.6<br>31             | 44 ± 1                      | 16                     |
| mGCaMP6f RS-1 EF-4 37 °C                            | 0.9 ± 0.1         | 12.9 ± 0.1        | 14.6 ± 1.2                                | 0.87 ± 0.14 (0.3) <sup>c</sup><br>961 ± 212 (0.7) <sup>c</sup> | 1.8 ± 0.4<br>1         | 210 ± 10 (0.7)<br>9 ± 1 (0.3)   | 3.3<br>77             | 199 ± 3                     | 3.5                    |

<sup>a</sup>Biphasic association kinetic records were fitted with two exponentials. The rate of each phase is given with the relative amplitudes in parentheses. <sup>b</sup>Measurements were made at 20, 25 and 30°C. The rate was too fast to measure at 37°C, thus value was extrapolated from the Arrhenius plot assuming the gradient remaining unchanged (Fig. 1f). <sup>c</sup>Values in parentheses represent relative fluorescence amplitudes of two binding sites. n.d. denotes not determined.

**Supplementary Table S2. Summary of the biophysical characteristics of double EF-hand mutated mGCaMP6s and mGCaMP6f probes.**

|                                   | $F_{f(-Ca^{2+})}$ | $F_{f(+Ca^{2+})}$ | $\frac{F_{f(+Ca^{2+})}}{F_{f(-Ca^{2+})}}$ | $K_d$<br>( $\mu M$ )          | $n$       | $k_{on(lim)}$<br>( $s^{-1}$ ) | $t_{1/2(on)}$<br>(ms) | $k_{off}$<br>( $s^{-1}$ )    | $t_{1/2(off)}$<br>(ms) |
|-----------------------------------|-------------------|-------------------|-------------------------------------------|-------------------------------|-----------|-------------------------------|-----------------------|------------------------------|------------------------|
| mGCaMP6s EF-3:4 <b>20 °C</b>      | 1.0 ± 0.1         | 5.8 ± 2.3         | 5.8 ± 1.2                                 | 2.7 ± 0.1 (0.2)               | 1.8 ± 0.1 | 141 ± 8 (0.2) <sup>a</sup>    | <b>5</b>              | 13.4 ± 0.1                   | <b>52</b>              |
|                                   |                   | 19.0 ± 0.2        | 19.1 ± 0.3                                | 466 ± 35 (0.8)                | 1         | 16 ± 1 (0.8) <sup>a</sup>     | <b>43</b>             |                              |                        |
| mGCaMP6s EF-3:4 <b>37 °C</b>      | n.d.              | n.d.              | n.d.                                      | n.d.                          | n.d.      | 74 ± 2                        | <b>9</b>              | 93 ± 9                       | <b>7</b>               |
| mGCaMP6s RS-1 EF-3:4 <b>20 °C</b> | 1.1 ± 0.1         | 1.3 ± 0.4         | 1.3 ± 0.3                                 | 3.3 ± 0.2 (0.2) <sup>c</sup>  | 1.8 ± 0.1 | n.d.                          | n.d.                  | 135 ± 3 (0.6) <sup>a</sup>   | <b>5</b>               |
|                                   |                   | 5.8 ± 0.3         | 5.4 ± 0.4                                 | 6335 ± 874 (0.8) <sup>c</sup> | 1         |                               |                       | 12 ± 1 (0.4) <sup>a</sup>    | <b>58</b>              |
| mGCaMP6s RS-1 EF-3:4 <b>37 °C</b> | n.d.              | n.d.              | n.d.                                      | n.d.                          | n.d.      | n.d.                          | n.d.                  | 420 <sup>b</sup>             | <b>2</b>               |
|                                   |                   |                   |                                           |                               |           |                               |                       | 4.2 <sup>*</sup>             | <b>165</b>             |
| mGCaMP6f EF-3:4 <b>20 °C</b>      | 0.9 ± 0.1         | 2.0 ± 0.1         | 2.2 ± 0.2                                 | 2.2 ± 0.1 (0.3) <sup>c</sup>  | 1.7 ± 0.1 | 48 ± 1                        | <b>14</b>             | 67 ± 5 (0.4) <sup>a</sup>    | <b>10</b>              |
|                                   |                   | 5.7 ± 0.3         | 6.2 ± 0.4                                 | 3606 ± 261 (0.7) <sup>c</sup> | 1         |                               |                       | 3.0 ± 0.1 (0.6) <sup>a</sup> | <b>231</b>             |
| mGCaMP6f EF-3:4 <b>37 °C</b>      | n.d.              | n.d.              | n.d.                                      | n.d.                          | n.d.      | 276.0 <sup>b</sup>            | <b>3</b>              | 174 ± 5 (0.8) <sup>a</sup>   | <b>4</b>               |
|                                   |                   |                   |                                           |                               |           |                               |                       | 13 ± 1 (0.2) <sup>a</sup>    | <b>53</b>              |
| mGCaMP6f RS-1 EF-3:4 <b>20 °C</b> | 1.0 ± 0.1         | 1.4 ± 0.1         | 1.4 ± 0.1                                 | 1.2 ± 0.1                     | 2.5 ± 0.2 | n.d.                          | <b>n.d.</b>           | 65 ± 3                       | <b>11</b>              |
| mGCaMP6f RS-1 EF-3:4 <b>37 °C</b> | n.d.              | n.d.              | n.d.                                      | n.d.                          | n.d.      | n.d.                          | n.d.                  | 233 ± 18                     | <b>3</b>               |

<sup>a</sup>Biphasic kinetic records were fitted with two exponentials. The rate of each phase is given with the relative amplitudes in parentheses. <sup>b</sup>Measurements were made at 20, 25 and 30°C. The rates was too fast to measure at 37°C, thus the value was extrapolated from the Arrhenius plot assuming the gradient remaining unchanged (**Supplementary Fig. S4b,S9c**). <sup>c</sup>Values in parentheses represent relative fluorescence amplitudes of two binding sites. Error represents the standard error of the estimate for the average of three records. n.d. denotes not determined.



Supplementary Table S3

|                                                    | $k_{+1}$<br>( $\mu\text{M}^{-1} \text{s}^{-1}$ ) | $k_{-1}$<br>( $\text{s}^{-1}$ ) | $k_{+2}$<br>( $\mu\text{M}^{-1} \text{s}^{-1}$ ) | $k_{-2}$<br>( $\text{s}^{-1}$ ) | $k_{+3}$<br>( $\mu\text{M}^{-1} \text{s}^{-1}$ ) | $k_{-3}$<br>( $\text{s}^{-1}$ ) | $k_{+4}$<br>( $\text{s}^{-1}$ ) | $k_{-4}$<br>( $\text{s}^{-1}$ ) | $k_{+5}$<br>( $\mu\text{M}^{-1} \text{s}^{-1}$ ) | $k_{-5}$<br>( $\text{s}^{-1}$ ) | $k_{+6}$<br>( $\mu\text{M}^{-1} \text{s}^{-1}$ ) | $k_{-6}$<br>( $\text{s}^{-1}$ ) | $k_{+7}$<br>( $\mu\text{M}^{-1} \text{s}^{-1}$ ) | $k_{-7}$<br>( $\text{s}^{-1}$ ) | $k_{+8}$<br>( $\text{s}^{-1}$ ) | $k_{-8}$<br>( $\text{s}^{-1}$ ) | $F_1$ | $F_2$ | $K_d$<br>( $\mu\text{M}$ ) |
|----------------------------------------------------|--------------------------------------------------|---------------------------------|--------------------------------------------------|---------------------------------|--------------------------------------------------|---------------------------------|---------------------------------|---------------------------------|--------------------------------------------------|---------------------------------|--------------------------------------------------|---------------------------------|--------------------------------------------------|---------------------------------|---------------------------------|---------------------------------|-------|-------|----------------------------|
| GCaMP6f 20 °C                                      | 770                                              | 1100                            | 15038                                            | 935                             | 786                                              | 1.0E-02                         | 395                             | 1210                            | 84                                               | 252                             | 3464                                             | 980                             | 2185                                             | 19                              | 548                             | 5.0E-03                         | 54    | 14    | 0.22                       |
| GCaMP6f 37 °C                                      | 770                                              | 1100                            | 15038                                            | 935                             | 786                                              | 2.1E-05                         | 408                             | 1242                            | 84                                               | 252                             | 3464                                             | 264                             | 2185                                             | 19                              | 548                             | 3.8E-05                         | 59    | 14    | 0.088                      |
| mGCaMP6f RS-1 EF-3 (GCaMP6f <sub>off</sub> ) 20 °C | 770                                              | 1100                            | 15038                                            | 935                             | 337867                                           | 2.9E-03                         | 138                             | 37                              | -                                                | -                               | 84                                               | 23651                           | 963                                              | 1793                            | 1232                            | 8.0E-04                         | 20    | 15    | 0.89                       |
| mGCaMP6f RS-1 EF-3 (GCaMP6f <sub>off</sub> ) 30 °C | 770                                              | 1100                            | 15038                                            | 935                             | 337867                                           | 2.9E-03                         | 223                             | 71                              | -                                                | -                               | 84                                               | 23651                           | 963                                              | 1793                            | 1232                            | 1.8E-03                         | 16    | 15    | 0.57                       |
